# Supplementary material for: Optimization in the expression of ASFV proteins for the development of subunit vaccines using poxviruses as delivery vectors
Source: PubMed Central journal article supplement (PMC8648923; doi:10.1038/s41598-021-02949-x), 2021-12-06
Supplement: 41598_2021_2949_MOESM1_ESM.pdf [file 41598_2021_2949_MOESM1_ESM.pdf]

## Supplementary information

### Optimization in the expression of ASFV proteins for the development of subunit vaccines using poxviruses as delivery vectors.

#### Authors

Jaime Lopera-Madrid; Lex G. Medina-Magües; Douglas P. Gladue; Manuel V. Borca; Jorge E. Osorio.

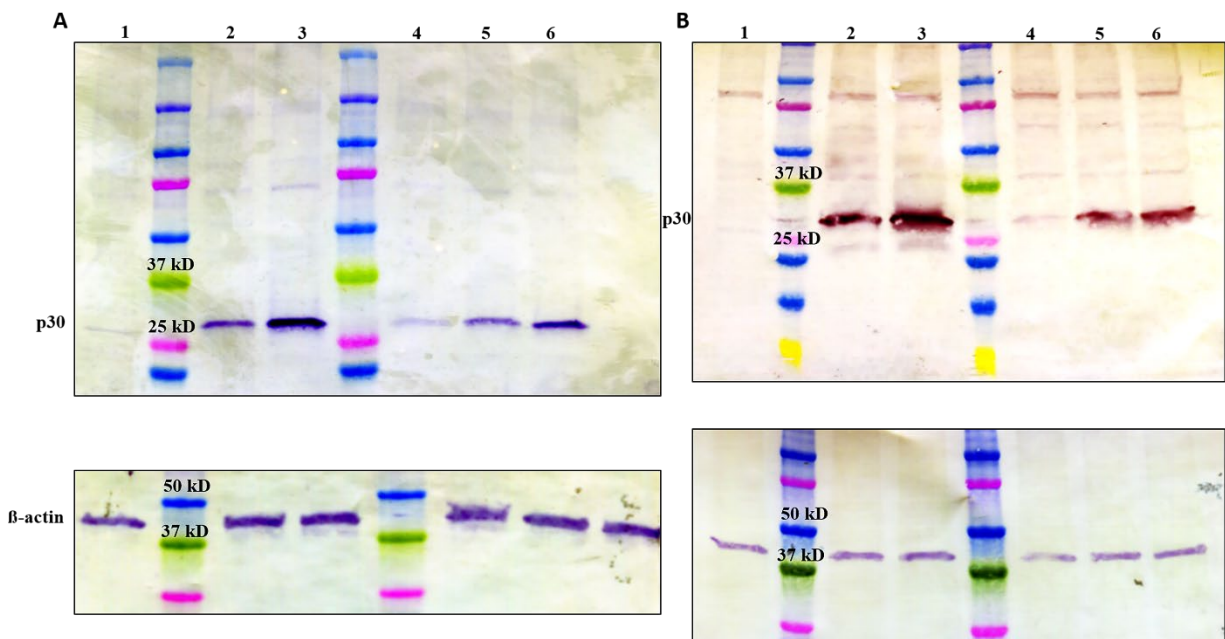

**Figure S1. Expression of p30 protein.** Monolayers of DF-1 and Vero cells were infected with each MVA-p30 virus at an MOI of 5, and then total protein extraction was performed at 24 hr p.i. Extracted proteins were subjected to SDS-PAGE followed by western blot analysis, and parallel blots were incubated with swine serum from a convalescent animal inoculated with ASFV, or an anti- $\beta$ -actin antibody (Sigma, # A544). (A) indicates proteins from DF-1 cells and (B) from Vero cells. The order is as follows, MVA-GFP control (1), PrMVA-13.5 (2), pHyb (3), S E/L-C13L (4), PrS5E (5), and S E/L (6). A parallel blot incubated with a  $\beta$ -actin specific monoclonal antibody served as loading control. Molecular masses of marker proteins are indicated.

| Primer name | Sequence (5' → 3')                                                                                     | Length | Fluorophore          | Amplicon (bp) | Target                                 |
|-------------|--------------------------------------------------------------------------------------------------------|--------|----------------------|---------------|----------------------------------------|
| ASFV-p30_F3 | CCCGACTTCAACAAGGTGAT                                                                                   | 20     | None                 | 84            | ASFV p30                               |
| ASFV-p30_R3 | CACCTCCTTCTCCTCCTCCT                                                                                   | 20     | None                 |               |                                        |
| ASFV-p30_P3 | CGCGCCCACTTCATCCA                                                                                      | 20     | 5' 6-FAM/ZEN/3' IBFQ |               |                                        |
| mCherry_F1  | GACCACCTACAAGCCAAGA                                                                                    | 20     | None                 | 79            | mCherry                                |
| mCherry_R1  | GTGGGAGGTGATGTCCAAC                                                                                    | 20     | None                 |               |                                        |
| mCherry_P1  | CCGGCGCCTACAACGTCAAC                                                                                   | 20     | 5' 6-FAM/ZEN/3' IBFQ |               |                                        |
| cACTB_F1    | TGCGTGACATCAAGGAGAAG                                                                                   | 20     | None                 | 90            | <i>Gallus gallus</i> ACTB (beta-actin) |
| cACTB_R1    | AGAGCTAGAGGCAGCTGTGG                                                                                   | 20     | None                 |               |                                        |
| cACTB_P1    | CGTCGCACTGGATTTCGAGCA                                                                                  | 21     | 5' 6-FAM/ZEN/3' IBFQ |               |                                        |
| hACTB       | PrimeTime Std qPCR Assay - Primers and probe for Human ACTB (beta-actin). IDTdna (#Hs.PT.39a.22214847) |        |                      |               |                                        |

**Table S1.** Description of primers and probes used to amplify the p30 and mCherry proteins. To ensure the correctness of the comparison, the chicken or human ACTB ( $\beta$ -actin gene) were used as normalizing control.
